# Supplementary material for: Cellular immune profiling after sequential clofarabine and lenalidomide for high risk myelodysplastic syndromes and acute myeloid leukemia
Source: PubMed Central journal article supplement — Leuk Res Rep. 2017 Apr 13;7:40–4. doi: 10.1016/j.lrr.2017.04.003 (PMC5402630; doi:10.1016/j.lrr.2017.04.003), 2017-04-13
Supplement: mmc1.pdf [file mmc1.pdf]

## Supplementary material

### Clinical study design

The study was designed as an open label, single institution phase I study at the National Heart, Lung, Blood Institute, National Institutes of Health and was approved by Institutional Review Board (NIH protocol 12-H-0146: NCT01629082). All patients signed an informed consent prior to enrollment and the study was conducted in compliance with the Declaration of Helsinki. The eligibility criteria includes the patients with diagnosis of high risk MDS patients (IPSS risk score at or greater than intermediate 2), CMML, and AML who were not candidates for standard intensive chemotherapy or allogeneic stem cell transplantation. Eligible patients must have failed at least one prior therapy before study enrollment. Patients were excluded if they received clofarabine at any dose or lenalidomide at dose of more than 25mg daily. Inadequate organ functions were also excluded; ejection fraction less than 40% by echocardiogram or MUGA, creatinine clearance less than 60 ml/min, total bilirubin greater than 1.5 times upper limit of normal, aspartate transaminase (AST) or alanine transaminase (ALT) greater than three times upper limit of normal.

Subjects received a single course of intravenous low-dose clofarabine 5mg/m<sup>2</sup>/day for five days with pre-medications of ondansetron 16mg by mouth (or 8mg intravenously) and dexamethasone 12mg once daily prior to clofarabine infusion. At 28 days after induction therapy with clofarabine, oral lenalidomide was initiated with dose escalation from 25 mg daily up to 50 mg daily for 21 days of 28 days. In the absence of dose limiting toxicity (DLT) or disease progression, subjects received lenalidomide 10 mg daily in 28 day-cycles with dose adjustments, for up to 12 cycles. DLT was defined as at or greater than grade 3 non-hematologic toxicity related to lenalidomide, prolonged bone marrow aplasia, or grade 4 thromboembolic event related to study treatment. The primary study endpoint was the toxicity profile of this novel treatment combination in each cohort. Patients remained on study until one of the following conditions was met: unacceptable toxicity or treating physician discretion or death. Response assessment was performed according to International Working Group (IWG) response criteria.

Supplementary Figure 1

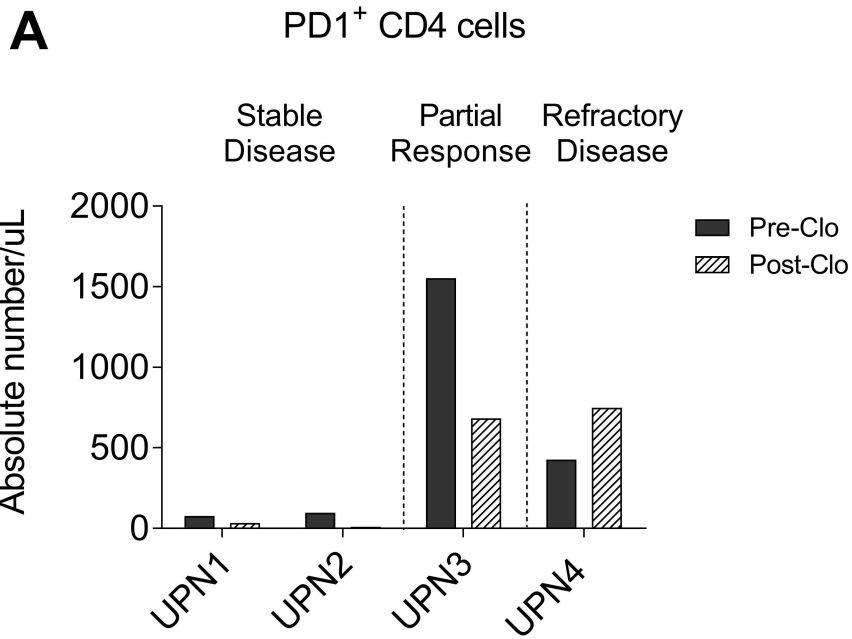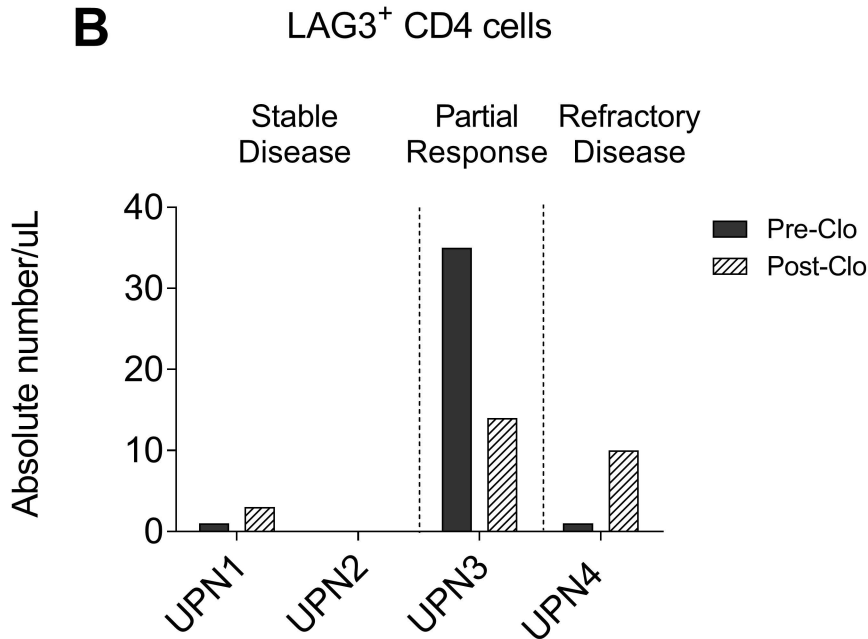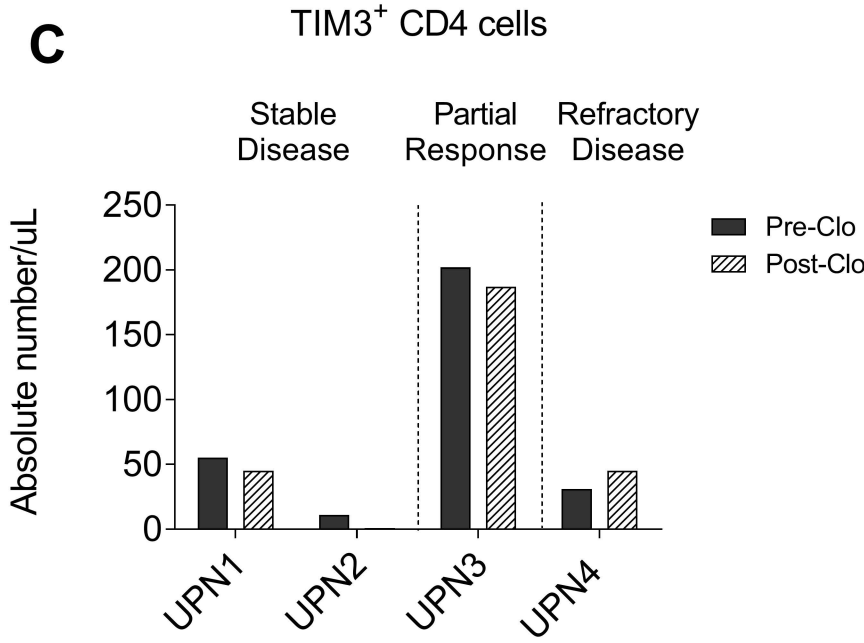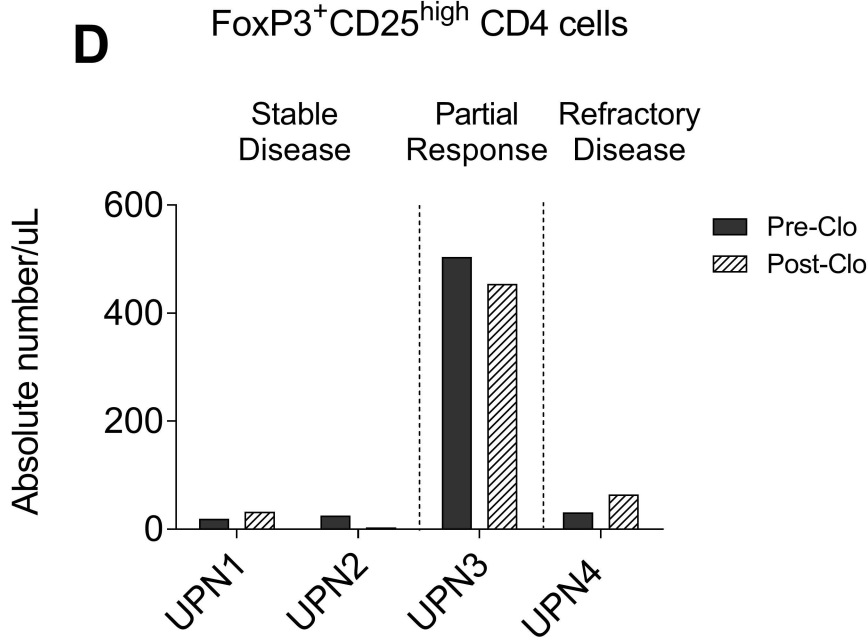

Supplementary Fig 2

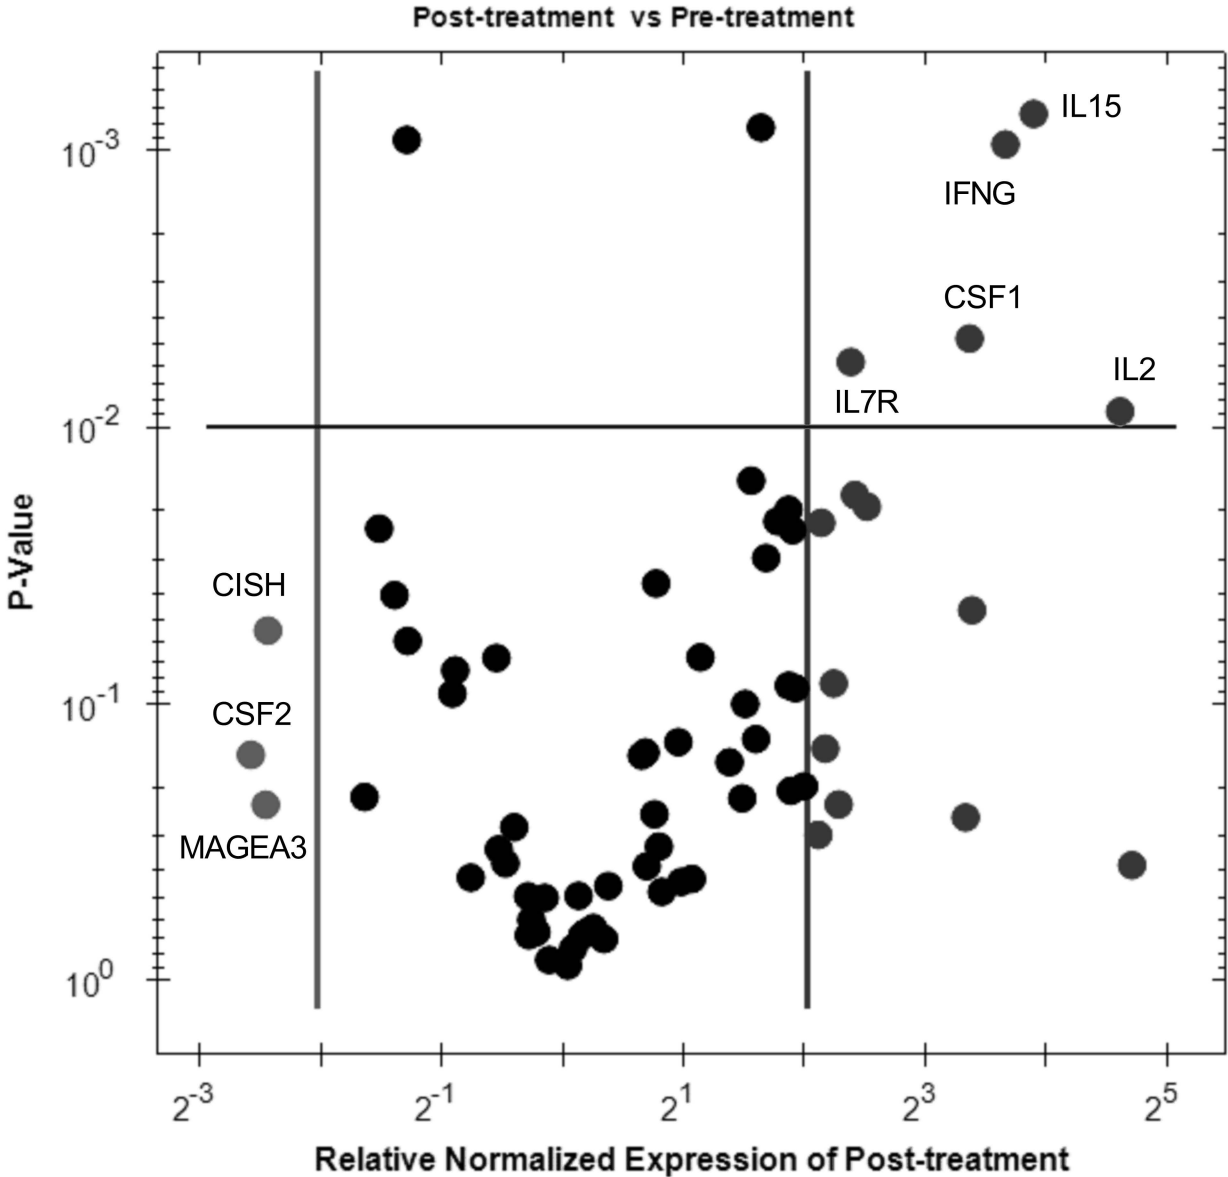

Supplementary Table 1.

| Antibody                 | Fluorochrome       | Vendor               | Cat.No     | Clone   | Isotype                   |
|--------------------------|--------------------|----------------------|------------|---------|---------------------------|
| T cell surface phenotype |                    |                      |            |         |                           |
| CD4                      | BUV 396            | BD Horizon           | 563550     | SK3     | Mouse<br>IgG1,kappa       |
| CD8                      | BUV496             | BD Horizon           | 564804     | RPA-T8  | Mouse,<br>IgG1,<br>kappa  |
| CD45RO                   | BV711              | Biologend            | 304236     | IVN31   | Mouse,<br>IgG2a,<br>kappa |
| CD127                    | BV650              | Biologend            | 351326     | AO19D5  | Mouse,<br>IgG1,<br>kappa  |
| CD3                      | BV605              | Biologend            | 317321     | OKT3    | Mouse,<br>IgG2a,<br>kappa |
| CD14                     | PB                 | Life<br>technologies | MHCD1428   | TuK4    | Mouse,<br>IgG2a,<br>kappa |
| CD19                     | PB                 | Life<br>technologies | MHCD1928   | SJ25-C1 | Mouse,<br>IgG1,<br>kappa  |
| CD27                     | BV510              | Biologend            | 302836     | O323    | Mouse,<br>IgG1,<br>kappa  |
| CD25                     | Alexa Fluor<br>700 | Biologend            | 356118     | M-A251  | Mouse,<br>IgG1 kappa      |
| CD45RA                   | APCCy7             | Biologend            | 304128     | HI100   | Mouse,<br>IgG2b,<br>kappa |
| PD-1                     | PE                 | Biologend            | 329906     | EH12    | Mouse<br>IgG1,<br>kappa   |
| LAG-3                    | FITC               | eBioscience          | 11-2239-42 | 3DS223H | Mouse,<br>IgG1,<br>kappa  |
| LAG-3                    | APC                | eBioscience          | 17-2239-42 | 3DS223H | Mouse,<br>IgG1,<br>kappa  |
| TIM-3                    | FITC               | Biologend            | 345022     | F38-2E2 | Mouse,<br>IgG1,<br>kappa  |

|                        |           |                 |            |         |                      |
|------------------------|-----------|-----------------|------------|---------|----------------------|
| PDL1                   | PE/dazzle | Biolegend       | 329732     | 29E.2A3 | Mouse, IgG2b, kappa  |
| CD127(IL-7R $\alpha$ ) | BV711     | Biolegend       | 351328     | A019D5  | Mouse, IgG1, kappa   |
| CD45RA                 | BV650     | Biolegend       | 304136     | HI100   | Mouse, IgG2b, kappa  |
| HLADR                  | APCCy7    | Biolegend       | 307618     | L243    | Mouse, IgG2a, kappa  |
| CD39                   | PECy7     | Biolegend       | 328212     | A1      | Mouse, IgG1, kappa   |
| CD95                   | PE/Dazzle | Biolegend       | 305634     | DX2     | Mouse, IgG1, kappa   |
| CCR7(CD197)            | BV785     | Biolegend       | 353230     | G043H7  | Mouse, IgG2a, kappa  |
| PDL1(CD 274)           | PECy7     | BD Pharmingen   | 558017     | MIH100  | Mouse, IgG1, kappa   |
| Intracellular staining |           |                 |            |         |                      |
| FoxP3                  | APC       | eBioscience     | 17-4777-42 | 234A/E7 | Mouse, IgG1, kappa   |
| Helios                 | PE        | Biolegend       | 137216     | 22F6    | Armenian Hamster IgG |
| NK cell phenotype      |           |                 |            |         |                      |
| CD158a,h               | PECy5.5   | Beckman Coulter | A66898     | EB6B    | Mouse, IgG1, kappa   |

|              |          |                    |            |          |                           |
|--------------|----------|--------------------|------------|----------|---------------------------|
| CD158b1/b2,j | PECy5.5  | Beckman<br>Coulter | A66900     | GL183    | Mouse,<br>IgG1,<br>kappa  |
| KIR3DL1      | Alexa700 | Biolegend          | 312712     | DX-9     | Mouse,<br>IgG1,<br>kappa  |
| LIR1         | APC      | eBioscience        | 17-5129-42 | HP-F1    | Mouse,<br>IgG1,<br>kappa  |
| CD56         | PECy7    | BD                 | 335809     | NCAM16.2 | Mouse,<br>IgG2b,<br>kappa |
| NKG2A        | PE       | Beckman<br>Coulter | IM3291U    | z199     | Mouse,<br>IgG2b,<br>kappa |
| CD57         | FITC     | BD<br>Pharmingen   | 555619     | NK-1     | Mouse,<br>IgM, kappa      |
| CD16         | V500     | BD Horizon         | 561394     | 3G8      | Mouse,<br>IgG1,<br>kappa  |

Supplementary Figure/Table Legends:

Supplementary Figure 1. Change in absolute number of T cells with exhaustion markers and Tregs post clofarabine (post clo) with respect to pre clofarabine(pre-Clo). A. Absolute numbers of PD1<sup>+</sup>CD4 T cells. B. Absolute number of LAG3<sup>+</sup>CD4 T cells. C. Absolute numbers of TIM3<sup>+</sup>CD4 T cells. D. Absolute numbers of FOXP3<sup>+</sup>CD25<sup>+</sup>CD4 T cells (Tregs)

Supplementary Figure 2. Upregulation of T cell and NK cell cytotoxic genes after lenalidomide therapy. Volcano Plot with upregulated (Right upper and lower quadrants) and downregulated targets (Left upper and lower quadrants). P-value was shown in Y axis and relative normalized expression was shown in X-axis. After lenalidomide therapy, significant up-regulations of genes were observed in IL-15, IFNG, CSF1, IL7R, and IL-2.

Supplementary Table 1: List of Fluorescent antibodies used in multicolor flow cytometry.
